# Supplementary material
Source: Springer Nature journal article supplement (https://www.springermedizin.de/resource/supplementary/12955_2013_1335_MOESM1_ESM.pdf/9559550)
Supplement: MOESM1 [file 9559550]

A causa de su cadera, ¿qué grado de dificultad tiene para realizar las actividades siguientes?

|                                                                               | Ninguna dificultad       | Dificultad leve          | Dificultad Moderada      | Dificultad extrema       | Incapaz de hacerlo       | No Responde              |
|-------------------------------------------------------------------------------|--------------------------|--------------------------|--------------------------|--------------------------|--------------------------|--------------------------|
| Girar/pivotar sobre la pierna afectada                                        | <input type="checkbox"/> | <input type="checkbox"/> | <input type="checkbox"/> | <input type="checkbox"/> | <input type="checkbox"/> | <input type="checkbox"/> |
| Darse la vuelta en la cama                                                    | <input type="checkbox"/> | <input type="checkbox"/> | <input type="checkbox"/> | <input type="checkbox"/> | <input type="checkbox"/> | <input type="checkbox"/> |
| Efectuar trabajos ligeros o moderados (estar de pie, caminar)                 | <input type="checkbox"/> | <input type="checkbox"/> | <input type="checkbox"/> | <input type="checkbox"/> | <input type="checkbox"/> | <input type="checkbox"/> |
| Efectuar trabajos pesados (empujar/arrastrar, subirse a sitios, cargar pesos) | <input type="checkbox"/> | <input type="checkbox"/> | <input type="checkbox"/> | <input type="checkbox"/> | <input type="checkbox"/> | <input type="checkbox"/> |
| Realizar actividades de ocio                                                  | <input type="checkbox"/> | <input type="checkbox"/> | <input type="checkbox"/> | <input type="checkbox"/> | <input type="checkbox"/> | <input type="checkbox"/> |

¿Como puntuaría usted de 0 a 100 su nivel actual de funcionamiento durante sus actividades de la vida diaria habituales (siendo 100 el nivel de funcionamiento antes de su problema de cadera y 0 la incapacidad para realizar cualquiera de sus actividades de la vida diaria habituales)?

.0%

## Subescala de deportes

A causa de su cadera, ¿qué grado de dificultad tiene para realizar las actividades siguientes?

|                                                                            | Ninguna dificultad       | Dificultad leve          | Dificultad Moderada      | Dificultad extrema       | Incapaz de hacerlo       | No Responde              |
|----------------------------------------------------------------------------|--------------------------|--------------------------|--------------------------|--------------------------|--------------------------|--------------------------|
| Correr 1,5 km                                                              | <input type="checkbox"/> | <input type="checkbox"/> | <input type="checkbox"/> | <input type="checkbox"/> | <input type="checkbox"/> | <input type="checkbox"/> |
| Saltar                                                                     | <input type="checkbox"/> | <input type="checkbox"/> | <input type="checkbox"/> | <input type="checkbox"/> | <input type="checkbox"/> | <input type="checkbox"/> |
| Balancear un objeto, como un palo de golf                                  | <input type="checkbox"/> | <input type="checkbox"/> | <input type="checkbox"/> | <input type="checkbox"/> | <input type="checkbox"/> | <input type="checkbox"/> |
| Caer sobre los pies tras un salto                                          | <input type="checkbox"/> | <input type="checkbox"/> | <input type="checkbox"/> | <input type="checkbox"/> | <input type="checkbox"/> | <input type="checkbox"/> |
| Echar a correr y pararse rápidamente                                       | <input type="checkbox"/> | <input type="checkbox"/> | <input type="checkbox"/> | <input type="checkbox"/> | <input type="checkbox"/> | <input type="checkbox"/> |
| Efectuar cambios de dirección / movimientos laterales                      | <input type="checkbox"/> | <input type="checkbox"/> | <input type="checkbox"/> | <input type="checkbox"/> | <input type="checkbox"/> | <input type="checkbox"/> |
| Efectuar actividades de bajo impacto como caminar deprisa                  | <input type="checkbox"/> | <input type="checkbox"/> | <input type="checkbox"/> | <input type="checkbox"/> | <input type="checkbox"/> | <input type="checkbox"/> |
| Capacidad para ejecutar la actividad con su técnica habitual               | <input type="checkbox"/> | <input type="checkbox"/> | <input type="checkbox"/> | <input type="checkbox"/> | <input type="checkbox"/> | <input type="checkbox"/> |
| Capacidad para practicar el deporte que desee durante el tiempo que quiera | <input type="checkbox"/> | <input type="checkbox"/> | <input type="checkbox"/> | <input type="checkbox"/> | <input type="checkbox"/> | <input type="checkbox"/> |

¿Cómo puntuaría de 0 a 100 su nivel actual de funcionamiento en las actividades relacionadas con el deporte (siendo 100 su nivel de funcionamiento antes de su problema de cadera y 0 la incapacidad para realizar cualquiera de sus actividades de la vida diaria habituales)?

.0%

¿Cómo puntuaría su nivel actual de funcionamiento?

Normal    Casi Normal    Anormal    Muy anormal
